# Supplementary material for: Synthesis of a NO-releasing lamellar silsesquioxane by topotactic exchange of CO2 for NO
Source: Royal Society of Chemistry journal article supplement (doi:10.1039/b901671f), 2009-01-01

## Synthesis of a NO-releasing lamellar material by topotactic exchange of CO<sub>2</sub> for NO

**Eric Besson, Julien Amalric, Ahmad Mehdi and P. Hubert Mutin\***

*Institut Charles Gerhardt, Chimie Moléculaire et Organisation du Solide, Université Montpellier, cc 1701. Place E. Bataillon, 34095 Montpellier Cedex 5 France. Fax: 33 4 6714 38 52; Tel: 33 4 6714 49 43.*

*E-mail : mutin@univ-montp2.fr*

### Electronic Supplementary Information

**ESI 1:** Raman spectroscopy recorded on LabRAM ARAMIS Microspectrometer using an excitation wavelength of 473 nm.

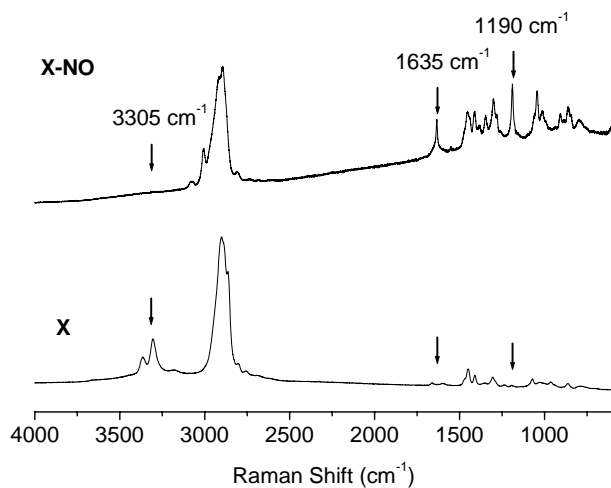

**ESI 2:** UV-Vis spectroscopy of X'-NO

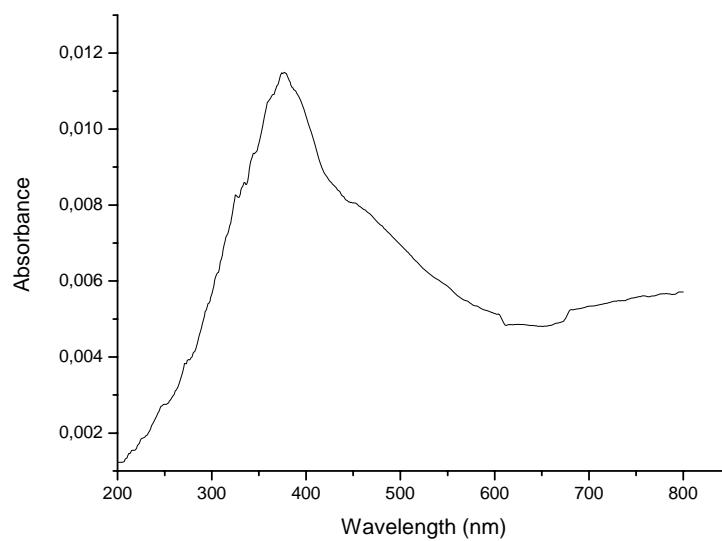

**ESI 3:** IR-TF spectroscopy of X'-NO

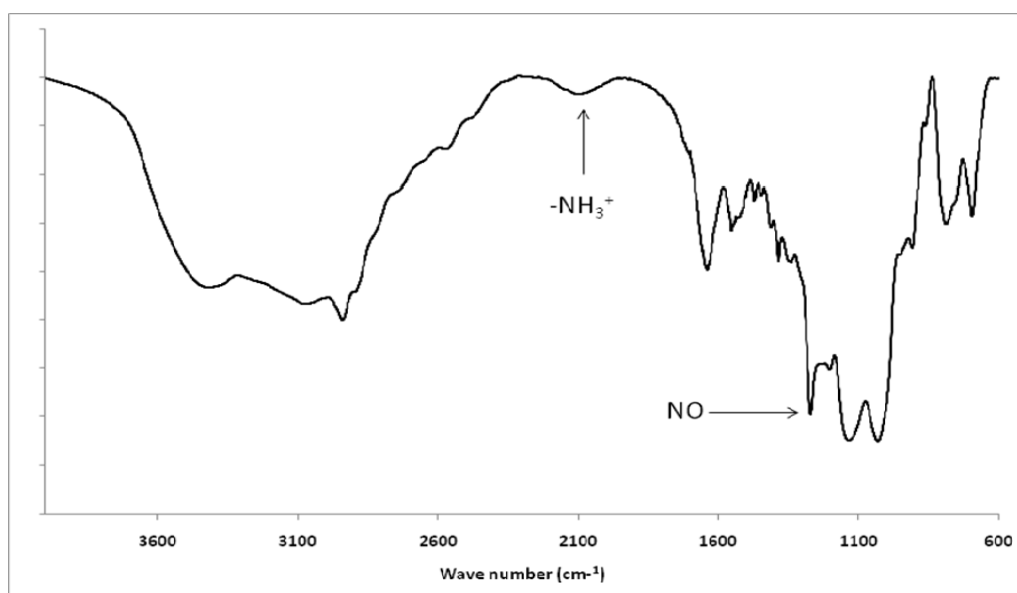

Supplement: b901671f.pdf [file b901671f.pdf]
